# Supplementary material
Source: publisher site journal article supplement (http://www.kjim.org/upload/media/kjim-2016-343-suppl1.pdf)
Supplement: Supplementary file 1 [file kjim-2016-343-suppl1.pdf]

**Supplementary Table 1. Baseline characteristics and metabolic syndrome status of male subjects**

| Characteristic                 | Overall        | Metabolic syndrome |                | p value |
|--------------------------------|----------------|--------------------|----------------|---------|
|                                |                | No                 | Yes            |         |
| No. of subjects                | 112,023        | 81,809 (73.0)      | 30,214 (27.0)  |         |
| Age group, yr                  |                |                    |                | < 0.001 |
| 20–44                          | 56,932 (50.82) | 46,566 (56.92)     | 10,366 (34.31) |         |
| 45–65                          | 43,499 (38.83) | 28,644 (35.01)     | 14,855 (49.17) |         |
| Above 65                       | 11,592 (10.35) | 6,599 (8.07)       | 4,993 (16.53)  |         |
| BMI, kg/m <sup>2</sup>         | 24.15 ± 3.05   | 23.47 ± 2.74       | 25.98 ± 3.11   | < 0.001 |
| Waist, cm                      | 83.60 ± 7.79   | 81.56 ± 6.77       | 89.14 ± 7.66   | < 0.001 |
| SBP, mmHg                      | 124.75 ± 14.08 | 122.13 ± 13.17     | 131.84 ± 14.03 | < 0.001 |
| DBP, mmHg                      | 78.13 ± 9.74   | 76.62 ± 9.23       | 82.23 ± 9.90   | < 0.001 |
| FBG, mg/dL                     | 99.17 ± 25.72  | 93.92 ± 18.56      | 113.38 ± 35.27 | < 0.001 |
| TC, mg/dL                      | 194.79 ± 36.29 | 192.79 ± 34.63     | 200.18 ± 39.97 | < 0.001 |
| TG, mg/dL                      | 154.7 ± 108.51 | 55.94 ± 33.03      | 48.21 ± 29.12  | < 0.001 |
| HDL-C, mg/dL                   | 53.9 ± 32.20   | 113.27 ± 39.89     | 110.30 ± 43.45 | < 0.001 |
| LDL-C, mg/dL                   | 112.5 ± 40.90  | 1.28 ± 1.59        | 1.28 ± 1.53    | < 0.001 |
| Cr, mg/dL                      | 1.3 ± 1.58     | 26.19 ± 17.29      | 30.77 ± 21.410 | 0.627   |
| AST, mg/dL                     | 27.4 ± 18.60   | 27.50 ± 22.66      | 36.77 ± 27.75  | < 0.001 |
| ALT, mg/dL                     | 30.0 ± 24.48   | 42.78 ± 50.69      | 67.65 ± 82.07  | < 0.001 |
| γGT, mg/dL                     | 49.5 ± 61.76   | 55.94 ± 33.03      | 48.21 ± 29.12  | < 0.001 |
| Hypertension                   | 22,089 (21.16) | 31,916 (54.29)     | 26,869 (45.71) | < 0.001 |
| Diabetes mellitus              | 12,672 (38.68) | 19,763 (45.61)     | 23,570 (54.39) | < 0.001 |
| Cardiac disorders              | 6,863 (6.58)   | 2,592 (3.44)       | 4,271 (14.77)  | < 0.001 |
| Stroke                         | 2,766 (2.65)   | 950 (1.26)         | 1,816 (6.28)   | < 0.001 |
| Smoking status                 |                |                    |                | < 0.001 |
| Non-smokers                    | 32,711 (30.18) | 24,195 (30.52)     | 8,516 (29.28)  |         |
| Past smokers                   | 26,416 (24.38) | 18,140 (22.88)     | 8,276 (28.45)  |         |
| Current smokers                | 49,242 (45.44) | 36,946 (46.60)     | 12,296 (42.27) |         |
| Alcohol consumption            |                |                    |                | < 0.001 |
| Non-drinkers                   | 30,630 (27.65) | 21,798 (26.96)     | 8,832 (29.53)  |         |
| Social drinkers                | 7,570 (6.83)   | 5,730 (7.09)       | 1,840 (6.15)   |         |
| Heavy drinkers                 | 72,573 (65.52) | 53,333 (65.96)     | 19,240 (64.32) |         |
| Exercise status                |                |                    |                | < 0.001 |
| Non-active                     | 92,959 (84.73) | 68,084 (85.04)     | 24,875 (83.91) |         |
| Active                         | 16,749 (15.27) | 11,979 (14.96)     | 4,770 (16.09)  |         |
| House hold income level        |                |                    |                | < 0.001 |
| 0–3                            | 17,855 (15.94) | 12,319 (15.06)     | 5,536 (18.32)  |         |
| 4–7                            | 46,673 (41.66) | 35,346 (43.21)     | 11,327 (37.49) |         |
| 8–10                           | 65,350 (58.34) | 34,144 (41.74)     | 13,351 (44.19) |         |
| Modified NCEP-ATP III criteria |                |                    |                |         |
| Abdominal obesity              | 19,686 (17.57) | 5,688 (6.95)       | 13,998 (46.33) | < 0.001 |
| Hypertriglyceridemia           | 52,396 (46.77) | 25,200 (30.80)     | 27,196 (90.01) | < 0.001 |
| Low HDL-C level                | 16,028 (14.31) | 5,855 (7.16)       | 10,173 (33.67) | < 0.001 |
| High blood pressure            | 52,396 (46.77) | 31,916 (39.01)     | 26,869 (88.93) | < 0.001 |
| Hyperglycemia                  | 43,333 (38.68) | 19,763 (24.16)     | 23,570 (78.01) | < 0.001 |

Values are presented as number (%) or geometric mean ± SD. Percentages may not sum to 100% because of missing data. Abdominal obesity, waist circumference ≥ 90 cm in men and ≥ 85 cm in women; hypertriglyceridemia, serum triglyceride ≥ 150 mg/dL; low HDL-C level, HDL-C < 40 mg/dL in men and < 50 mg/dL in women; high blood pressure, blood pressure ≥ 130/85 mmHg or current use of antihypertensive medication; hyperglycemia, serum glucose ≥ 100 mg/dL or current use of medication for diabetes.

BMI, body mass index; SBP, systolic blood pressure; DBP, diastolic blood pressure; FBG, fasting blood glucose; TC, total cholesterol; TG, triglyceride; HDL-C, high density lipoprotein cholesterol; LDL-C, low density lipoprotein cholesterol; Cr, creatinine; AST, aspartate transaminase; ALT, alanine aminotransferase; γGT, gamma-glutamyl transpeptidase; NCEP-ATP, National Cholesterol Education Program-Adult Treatment Panel.
